# Supplementary material for: Interaction of d10 metal ions with thioether ligands: a thermodynamic and theoretical study
Source: Royal Society of Chemistry journal article supplement (doi:10.1039/c3dt32332c), 2013-01-01

# Interaction of d<sup>10</sup> Metal Ions with thioether ligands: a thermodynamic and theoretical study.

*Andrea Melchior,<sup>a\*</sup> Elena Peralta,<sup>a,b</sup> Manuel Valiente,<sup>b</sup> Claudio Tavagnacco,<sup>c</sup>  
Francesco Endrizzi,<sup>d</sup> Marilena Tolazzi,<sup>a\*</sup>*

*<sup>a</sup> Dipartimento di Chimica Fisica e Ambiente, Università di Udine, Via del Cotonificio 108, 33100 Udine, Italy*

*<sup>b</sup> Departament de Química, Centre GTS, Universitat Autònoma de Barcelona, Campus Bellaterra Edificio CN, Barcelona, Spain*

*<sup>c</sup> Dipartimento di Scienze Chimiche e Farmaceutiche, Università di Trieste, , via Giorgieri 1, 34127 Trieste, Italy*

*<sup>d</sup> Dipartimento di Scienze Chimiche, Università di Padova, Via Marzolo 1, 35131 Padova, Italy*

**Electronic Supplementary Material**

Table S1 Experimental and calculated M-S bond distances for the  $[M(9AneS3)_2]^{2+}$  complexes. Also the weighted RMS obtained when superimposing (using gOpenMol graphics program) the calculated and experimental structures of the  $[M(9AneS3)_2]^{2+}$  complexes is reported. All functionals were used employing the same basis set (SDD ECP for the metal ion and 6-311++G(d,p) ).

| CSD code | Ref. | metal | M-S <sub>exp.</sub> (Å) | M-S <sub>calc.</sub> (Å) |       |       | Weighted RMS |        |        |
|----------|------|-------|-------------------------|--------------------------|-------|-------|--------------|--------|--------|
|          |      |       |                         | PBE                      | B3LYP | M06   | PBE          | B3LYP  | M06    |
| VEJNON   | 40   | Zn    | 2.496                   | 2.528                    | 2.575 | 2.530 | 0.0212       | 0.0467 | 0.0244 |
| AQADIF   | 36   | Cd    | 2.658                   | 2.705                    | 2.753 | 2.707 | 0.0277       | 0.0538 | 0.0309 |
| EZILEE   | 65   | Hg    | 2.683                   | 2.750                    | 2.810 | 2.770 | 0.0482       | 0.0789 | 0.0544 |
| FIJTOH10 | 44   | Ag    | 2.725                   | 2.754                    | 2.821 | 2.761 | 0.0098       | 0.061  | 0.050  |

Table S2 Calculated  $\Delta H$  values ( $\text{kJ mol}^{-1}$ ) relative to the reactions in Figure S2

|                  | $\Delta H_{1,\text{gas}}$ | $\Delta H_{2,\text{gas}}$ |
|------------------|---------------------------|---------------------------|
| $\text{Zn}^{2+}$ | -1194.1                   | -408.4                    |
| $\text{Cd}^{2+}$ | -970.3                    | -399.2                    |
| $\text{Hg}^{2+}$ | -1111.3                   | -378.2                    |
| $\text{Ag}^+$    | -359.4                    | -158.2                    |

Table S3 Calculated  $\Delta H$  and  $\Delta G$  values ( $\text{kJ mol}^{-1}$ ) for the reactions 5 and 6 (Figures 6 and 7, in the article)

|                  | <i>Gas phase with coordinated AN</i> |               |               |               | <i>AN (PCM)</i> |               |               |               |
|------------------|--------------------------------------|---------------|---------------|---------------|-----------------|---------------|---------------|---------------|
|                  | $\Delta H(5)$                        | $\Delta H(6)$ | $\Delta G(5)$ | $\Delta G(6)$ | $\Delta H(5)$   | $\Delta H(6)$ | $\Delta G(5)$ | $\Delta G(6)$ |
| $\text{Zn}^{2+}$ | 56.9                                 | 54.4          | -11.4         | -1.3          | -14.7           | -18.2         | -37.2         | -28.2         |
| $\text{Cd}^{2+}$ | 58.6                                 | 56.1          | -9.7          | 4.2           | -14.8           | -36.8         | -37.2         | -42.8         |
| $\text{Hg}^{2+}$ | 8.4                                  | 8.8           | -57.1         | -40.8         | -72.6           | -83.4         | -92.6         | -87.2         |
| $\text{Ag}^+$    | 8.4                                  | -47.3         | -30.4         | -41.1         | -49.2           | -17.8         | -42.1         | -11.4         |

**Figure S1** Experimental vs. theoretical free energies of solvation in acetonitrile ( $\Delta G_{sv}$ ) for the three cations studied in this work.

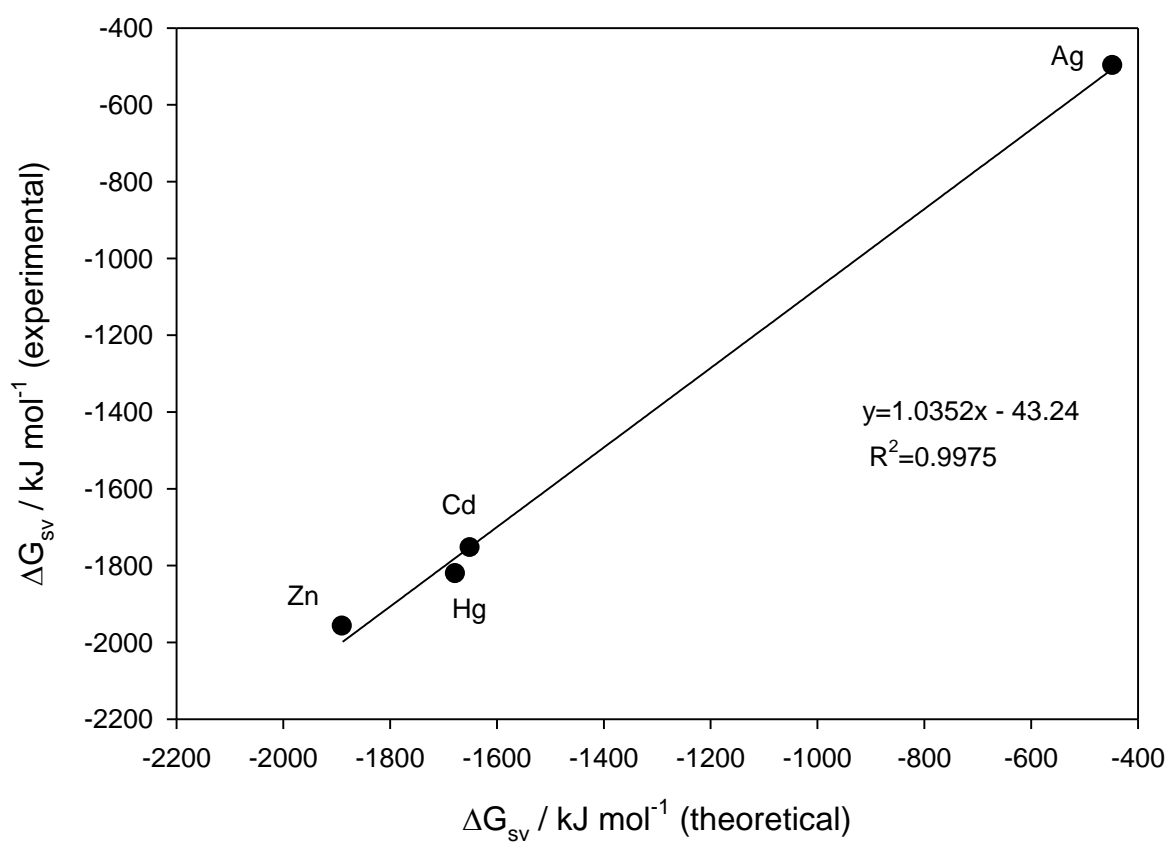

**Figure S2** Calculated reaction enthalpy values,  $\Delta H_{1\text{gas}}$  and  $\Delta H_{2\text{gas}}$ , for the reactions:

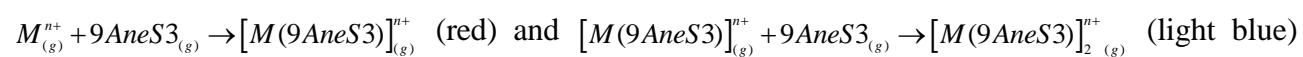

respectively, in gas phase.

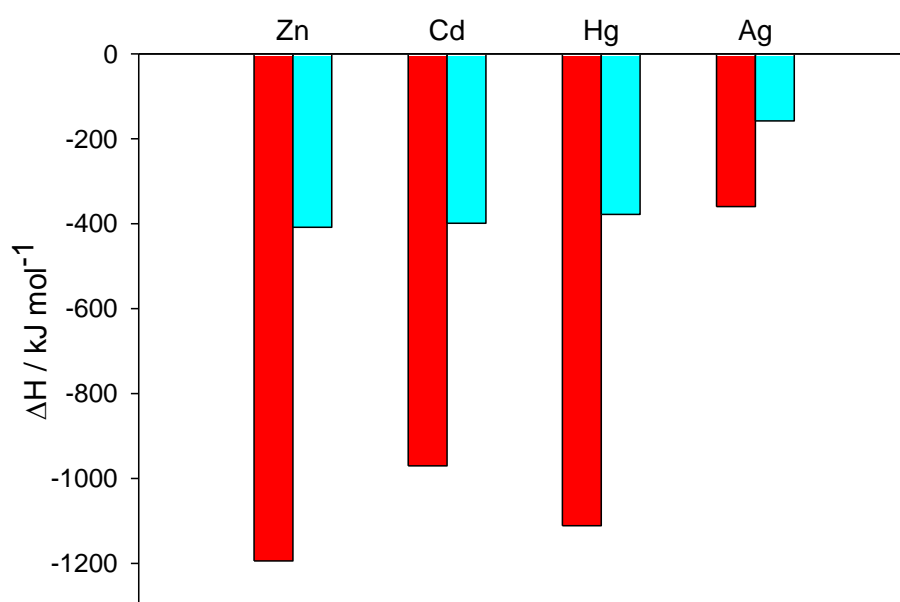

Supplement: c3dt32332c.pdf [file c3dt32332c.pdf]
